# Supplementary material
Source: publisher figshare collection journal article supplement (https://acs.figshare.com/ndownloader/files/3929338)
Supplement: Supplementary file 1 [file 3929338]

# CIF-file generated for mono in P2(1)/c
 
#==============================================================================
data_global
#==============================================================================
 
# 0. AUDIT DETAILS
 
_audit_creation_date                 'Jul 08 19:38:25 2013'
_audit_creation_method               'PLATON <TABLE ACC> option'
_audit_update_record
;
;
 
#===============================================================================
 
# 1. SUBMISSION DETAILS
 
_publ_contact_author_name           
;
'Prof. T. N. Guru Row'
;
_publ_contact_author_address        
;
Solid State and Structural Chemistry Unit
 Indian Institute of Science
 Bangalore, 560 012
 India

;
 
_publ_contact_author_email           ssctng@sscu.iisc.ernet.in
_publ_contact_author_fax             '(91) 80 2360 1310'
_publ_contact_author_phone           '(91) 80 2293 3306'
 
_publ_requested_journal              'J. Phys. Chem. A'

_publ_requested_category             ?
_publ_requested_coeditor_name        ?
 
_publ_contact_letter                
;
 
Please consider this CIF submission for publication as a
Regular Structural Paper in  J. Phys. Chem. A.


Yours sincerely
T.N.Guru Row
;

#===============================================================================
 
# 2. PROCESSING SUMMARY (JOURNAL OFFICE ONLY)
 
_journal_date_recd_electronic        ?
 
_journal_date_to_coeditor            ?
_journal_date_from_coeditor          ?
_journal_date_accepted               ?
 
_journal_date_printers_first         ?
_journal_date_printers_final         ?
_journal_date_proofs_out             ?
_journal_date_proofs_in              ?
 
_journal_coeditor_name               ?
_journal_coeditor_code               ?
_journal_coeditor_notes
;
;
 
_journal_techeditor_code             ?
_journal_techeditor_notes
;
;
 
_journal_coden_ASTM                  ?
_journal_name_full                   ?
_journal_year                        ?
_journal_volume                      ?
_journal_issue                       ?
_journal_page_first                  ?
_journal_page_last                   ?
 
 
_journal_suppl_publ_number           ?
_journal_suppl_publ_pages            ?
 
 
#===============================================================================
 
# 3. TITLE AND AUTHOR LIST
 
_publ_section_title
;
;
_publ_section_title_footnote
;
;
 
# The loop structure below should contain the names and adresses of all
# authors, in the required order of publication. Repeat as necessary.
 
 
loop_
_publ_author_name
_publ_author_address
'Rumpa Pal'
;
Solid State and Structural Chemistry Unit
Indian Institute of Science
Bangalore 560 012, Karnataka
India
;
'Prof. T. N.Guru Row' 
;   
Solid State and Structural Chemistry Unit
Indian Institute of Science
Bangalore 560 012, Karnataka
India
;
 
#===============================================================================
 
# 4. TEXT
 
_publ_section_synopsis
;
 ?
;
_publ_section_abstract
;
 ?
;
 
# Insert blank lines between paragraphs
 
_publ_section_comment
;
;
_publ_section_exptl_prep
;
 ?
;
_publ_section_exptl_refinement
;
 ?
;
 
_publ_section_references
;
 Farrugia, L. J. (1999). <i>J. Appl. Cryst.</i> <b>32</b>, 837--838.
  
Sheldrick, G.M. (1997). <i>SHELXL97</i>. University of G\"ottingen, Germany.
 
Spek, A.L. (2003). <i>J. Appl. Cryst.</i> <b>36</b>, 7--13.

Watkin, D. M., Pearce, L. & Prout, C. K. (1993). <i>CAMERON</i>. Chemical
Crystallography Laboratory, University of Oxford, England.

;
_publ_section_acknowledgements
;
We thank the Department of Science and Technology, India, for use of the CCD
facility setup under the IRHPA-DST program at IISc.
;
_publ_section_figure_captions
;
Fig. 1. 
View of the molecular structure of (I) showing the atom
labelling scheme.  Displacement ellipsoids are showed at the 50% 
probability level. H atoms are shown as  small spheres of 
arbitrary radii.
;

 
#===============================================================================
 
data_mono
 
#===============================================================================
 
# 5. CHEMICAL DATA
 
_chemical_name_systematic
;
;
_chemical_name_common                ?
_chemical_melting_point              ?
_chemical_formula_moiety
'C30 H21 N O4'
# Ex: 'C12 H16 N2 O6, H2 O' and '(Cd 2+)3, (C6 N6 Cr 3-)2, 2(H2 O)'
_chemical_formula_structural         ?
_chemical_formula_sum
'C30 H21 N O4'
_chemical_formula_iupac              ?
_chemical_formula_weight                459.48
_chemical_compound_source           'see text'
 
loop_
_atom_type_symbol
_atom_type_description
_atom_type_scat_dispersion_real
_atom_type_scat_dispersion_imag
_atom_type_scat_source
 O   O    0.0106    0.0060
 'International Tables Vol C Tables 4.2.6.8 and 6.1.1.4'
 N   N    0.0061    0.0033
 'International Tables Vol C Tables 4.2.6.8 and 6.1.1.4'
 H   H    0.0000    0.0000
 'International Tables Vol C Tables 4.2.6.8 and 6.1.1.4'
 C   C    0.0033    0.0016
 'International Tables Vol C Tables 4.2.6.8 and 6.1.1.4'
 
#===============================================================================
 
# 6. CRYSTAL DATA
 
_symmetry_cell_setting                 Monoclinic
_symmetry_space_group_name_Hall      '-P 2ybc'
_symmetry_space_group_name_H-M       'P 21/c'
_symmetry_Int_Tables_number                 14
 
loop_
_symmetry_equiv_pos_site_id
_symmetry_equiv_pos_as_xyz
   1 x,y,z
   2 -x,1/2+y,1/2-z
   3 -x,-y,-z
   4 x,1/2-y,1/2+z
 
_cell_length_a                          10.6891(4)
_cell_length_b                           9.8020(3)
_cell_length_c                          21.9169(9)
_cell_angle_alpha                               90
_cell_angle_beta                        103.599(4)
_cell_angle_gamma                               90
_cell_volume                           2231.96(15)
_cell_formula_units_Z                    4
_cell_measurement_temperature        110(2)
_cell_measurement_reflns_used        19982
_cell_measurement_theta_min          2.8
_cell_measurement_theta_max          28.0
_cell_special_details
;
;
 
_exptl_crystal_description          ' plate '
_exptl_crystal_colour               ' dark red '
 
_exptl_crystal_size_max              0.35
_exptl_crystal_size_mid              0.10
_exptl_crystal_size_min              0.07
_exptl_crystal_size_rad              ?
_exptl_crystal_density_meas          ?
_exptl_crystal_density_diffrn            1.367
_exptl_crystal_density_method       'Not Measured'
_exptl_crystal_F_000                       960
_exptl_absorpt_coefficient_mu            0.091
_exptl_crystal_density_meas_temp     ?
 
# Permitted for _exptl_absorpt_correction_type :
# analytical     'analytical from crystal shape'
#                Example: de Meulenaer&Tompa: ABST
# cylinder       'cylindrical'
# gaussian       'Gaussian from crystal shape'
#                Example: PLATON/ABSG
# integration    'integration from crystal shape'
# multi-scan     'symmetry-related measurements'
#                Example: SADABS, MULABS
# none           'no absorption corr. applied'
# numerical      'numerical from crystal shape'
# psi-scan       'psi-scan corrections'
#                Example: PLATON/ABSP
# refdelf        'refined from delta-F'
#                Example: SHELXA,
# sphere         'spherical'
#                Example: PLATON/ABSS
_exptl_absorpt_correction_type      'multi-scan'
# Example: '(North et al., 1968)'
_exptl_absorpt_process_details      'CrysAlis RED (Oxford Diffraction,2009)'
_exptl_absorpt_correction_T_min      0.9691
_exptl_absorpt_correction_T_max      0.9938
 
#===============================================================================
 
# 7. EXPERIMENTAL DATA
 
_exptl_special_details
;
;
_diffrn_ambient_temperature          110(2)
_diffrn_radiation_wavelength           0.71073
_diffrn_radiation_probe              'x-ray'
_diffrn_radiation_type               'MoK\a'
_diffrn_radiation_source             'fine-focus sealed tube'
_diffrn_radiation_monochromator      graphite

 
_diffrn_measurement_device_type      ?
_diffrn_measurement_method           ?
_diffrn_detector_area_resol_mean     ?
 
# number of measured reflections (redundant set)
_diffrn_reflns_number             19982
_diffrn_reflns_av_R_equivalents   0.0637
_diffrn_reflns_av_sigmaI/netI     0.0731
_diffrn_reflns_limit_h_min        -14
_diffrn_reflns_limit_h_max        14
_diffrn_reflns_limit_k_min        -12
_diffrn_reflns_limit_k_max        12
_diffrn_reflns_limit_l_min        -28
_diffrn_reflns_limit_l_max        28
_diffrn_reflns_theta_min          2.82
_diffrn_reflns_theta_max          27.99
_diffrn_reflns_theta_full         27.99
_diffrn_measured_fraction_theta_max  0.997
_diffrn_measured_fraction_theta_full 0.997
_reflns_number_total              5361
_reflns_number_gt                 3589
_reflns_threshold_expression      >2sigma(I)

_diffrn_reflns_reduction_process
;
; 
_computing_data_collection       'CrysAlisPro CCD (Oxford Diffraction, 2009)' 
_computing_cell_refinement       'CrysAlisPro CCD (Oxford Diffraction, 2009)'  
_computing_data_reduction        'CrysAlisPro RED (Oxford Diffraction, 2009)'  
_computing_structure_solution    'SHELXS97  (Sheldrick, 2008)' 
_computing_structure_refinement  'SHELXL97 (Sheldrick, 2008)'
_computing_molecular_graphics     
 'Ortep-3 (Farrugia, 1997) and CAMERON (Watkin et al., 1993)' 
_computing_publication_material    'WinGX (Farrugia, 1999)'
 
#===============================================================================
 
# 8. REFINEMENT DATA

_refine_special_details
;
 Refinement of F^2^ against ALL reflections.  The weighted R-factor wR and
 goodness of fit S are based on F^2^, conventional R-factors R are based
 on F, with F set to zero for negative F^2^. The threshold expression of
 F^2^ > 2sigma(F^2^) is used only for calculating R-factors(gt) etc. and is
 not relevant to the choice of reflections for refinement.  R-factors based
 on F^2^ are statistically about twice as large as those based on F, and R-
 factors based on ALL data will be even larger.
;

_refine_ls_structure_factor_coef  Fsqd
_refine_ls_matrix_type            full
_refine_ls_weighting_scheme       calc
_refine_ls_weighting_details
 'calc w=1/[\s^2^(Fo^2^)+(0.0690P)^2^+0.0000P] where P=(Fo^2^+2Fc^2^)/3'
_atom_sites_solution_primary      direct
_atom_sites_solution_secondary    difmap
_atom_sites_solution_hydrogens    geom
_refine_ls_hydrogen_treatment     constr
_refine_ls_extinction_method      none
_refine_ls_extinction_coef        ?
_refine_ls_number_reflns          5361
_refine_ls_number_parameters      317
_refine_ls_number_restraints      0
_refine_ls_R_factor_all           0.0956
_refine_ls_R_factor_gt            0.0580
_refine_ls_wR_factor_ref          0.1574
_refine_ls_wR_factor_gt           0.1362
_refine_ls_goodness_of_fit_ref    1.042
_refine_ls_restrained_S_all       1.042
_refine_ls_shift/su_max           0.000
_refine_ls_shift/su_mean          0.000
_refine_diff_density_max    0.230
_refine_diff_density_min   -0.314
_refine_diff_density_rms    0.061
 
#===============================================================================
 
# 9. ATOMIC COORDINATES AND DISPLACEMENT PARAMETERS
 
loop_
 _atom_site_label
 _atom_site_type_symbol
 _atom_site_fract_x
 _atom_site_fract_y
 _atom_site_fract_z
 _atom_site_U_iso_or_equiv
 _atom_site_adp_type
 _atom_site_occupancy
 _atom_site_symmetry_multiplicity
 _atom_site_calc_flag
 _atom_site_refinement_flags
 _atom_site_disorder_assembly
 _atom_site_disorder_group
O1 O 0.28844(13) 0.26006(15) -0.00382(6) 0.0281(4) Uani 1 1 d . . .
O4 O 0.90907(14) 0.63622(15) 0.28477(7) 0.0287(4) Uani 1 1 d . . .
O2 O 1.12544(14) -0.04781(17) 0.10145(7) 0.0367(4) Uani 1 1 d . . .
N1 N 1.01244(17) -0.02657(19) 0.10193(8) 0.0286(4) Uani 1 1 d . . .
C4 C 0.62283(18) 0.2603(2) 0.03409(9) 0.0204(4) Uani 1 1 d . . .
O3 O 0.94928(16) -0.10014(17) 0.12892(8) 0.0406(4) Uani 1 1 d . . .
C2 C 0.46095(19) 0.3574(2) 0.07646(9) 0.0207(4) Uani 1 1 d . . .
C19 C 0.78025(19) 0.5009(2) 0.12523(9) 0.0221(4) Uani 1 1 d . . .
H19 H 0.7914 0.5095 0.0846 0.026 Uiso 1 1 calc R . .
C24 C 0.38386(18) 0.4424(2) 0.10955(9) 0.0209(4) Uani 1 1 d . . .
C12 C 0.75875(18) 0.2292(2) 0.03354(9) 0.0202(4) Uani 1 1 d . . .
C1 C 0.40361(19) 0.2758(2) 0.01869(9) 0.0228(4) Uani 1 1 d . . .
C16 C 0.94796(19) 0.0931(2) 0.06730(9) 0.0227(4) Uani 1 1 d . . .
C17 C 0.82083(19) 0.1191(2) 0.06795(9) 0.0233(4) Uani 1 1 d . . .
H17 H 0.7778 0.0641 0.0909 0.028 Uiso 1 1 calc R . .
C3 C 0.59021(19) 0.34768(19) 0.08505(9) 0.0202(4) Uani 1 1 d . . .
C18 C 0.68668(18) 0.4125(2) 0.13645(9) 0.0197(4) Uani 1 1 d . . .
C20 C 0.85814(18) 0.5772(2) 0.17328(9) 0.0223(4) Uani 1 1 d . . .
H20 H 0.9196 0.6367 0.1647 0.027 Uiso 1 1 calc R . .
C23 C 0.67571(19) 0.3973(2) 0.19883(9) 0.0237(4) Uani 1 1 d . . .
H23 H 0.6154 0.3368 0.2077 0.028 Uiso 1 1 calc R . .
C13 C 0.8276(2) 0.3106(2) 0.00038(9) 0.0244(5) Uani 1 1 d . . .
H13 H 0.7873 0.3847 -0.0226 0.029 Uiso 1 1 calc R . .
C14 C 0.9553(2) 0.2823(2) 0.00129(10) 0.0278(5) Uani 1 1 d . . .
H14 H 0.9998 0.3380 -0.0207 0.033 Uiso 1 1 calc R . .
C6 C 0.49446(19) 0.13297(19) -0.06303(9) 0.0209(4) Uani 1 1 d . . .
C21 C 0.84255(19) 0.5630(2) 0.23418(9) 0.0223(4) Uani 1 1 d . . .
C27 C 0.2309(2) 0.6149(2) 0.16360(10) 0.0300(5) Uani 1 1 d . . .
H27 H 0.1792 0.6727 0.1807 0.036 Uiso 1 1 calc R . .
C11 C 0.58601(19) 0.0383(2) -0.07268(9) 0.0240(5) Uani 1 1 d . . .
H11 H 0.6597 0.0234 -0.0411 0.029 Uiso 1 1 calc R . .
C29 C 0.2650(2) 0.3988(2) 0.11852(10) 0.0268(5) Uani 1 1 d . . .
H29 H 0.2362 0.3112 0.1064 0.032 Uiso 1 1 calc R . .
C8 C 0.3681(2) 0.0788(2) -0.16760(10) 0.0301(5) Uani 1 1 d . . .
H8 H 0.2945 0.0922 -0.1994 0.036 Uiso 1 1 calc R . .
C7 C 0.38337(19) 0.1504(2) -0.11183(9) 0.0253(5) Uani 1 1 d . . .
H7 H 0.3196 0.2107 -0.1066 0.030 Uiso 1 1 calc R . .
C5 C 0.51332(19) 0.2163(2) -0.00602(9) 0.0209(4) Uani 1 1 d . . .
C26 C 0.3501(2) 0.6593(2) 0.15645(9) 0.0255(5) Uani 1 1 d . . .
H26 H 0.3791 0.7464 0.1694 0.031 Uiso 1 1 calc R . .
C25 C 0.42582(19) 0.5732(2) 0.12984(9) 0.0236(4) Uani 1 1 d . . .
H25 H 0.5058 0.6032 0.1255 0.028 Uiso 1 1 calc R . .
C15 C 1.01656(19) 0.1725(2) 0.03455(9) 0.0262(5) Uani 1 1 d . . .
H15 H 1.1018 0.1523 0.0349 0.031 Uiso 1 1 calc R . .
C10 C 0.5689(2) -0.0334(2) -0.12840(9) 0.0272(5) Uani 1 1 d . . .
H10 H 0.6306 -0.0964 -0.1336 0.033 Uiso 1 1 calc R . .
C22 C 0.7527(2) 0.4705(2) 0.24685(9) 0.0255(5) Uani 1 1 d . . .
H22 H 0.7448 0.4582 0.2879 0.031 Uiso 1 1 calc R . .
C28 C 0.1898(2) 0.4844(2) 0.14520(10) 0.0314(5) Uani 1 1 d . . .
H28 H 0.1109 0.4538 0.1508 0.038 Uiso 1 1 calc R . .
C9 C 0.4607(2) -0.0122(2) -0.17650(10) 0.0286(5) Uani 1 1 d . . .
H9 H 0.4506 -0.0587 -0.2143 0.034 Uiso 1 1 calc R . .
C30 C 1.0093(2) 0.7246(2) 0.27506(10) 0.0339(6) Uani 1 1 d . . .
H30A H 1.0742 0.6715 0.2622 0.051 Uiso 1 1 calc R . .
H30B H 1.0469 0.7715 0.3134 0.051 Uiso 1 1 calc R . .
H30C H 0.9740 0.7899 0.2430 0.051 Uiso 1 1 calc R . .
 
loop_
 _atom_site_aniso_label
 _atom_site_aniso_U_11
 _atom_site_aniso_U_22
 _atom_site_aniso_U_33
 _atom_site_aniso_U_23
 _atom_site_aniso_U_13
 _atom_site_aniso_U_12
O1 0.0204(8) 0.0359(9) 0.0283(8) 0.0001(6) 0.0065(6) -0.0024(6)
O4 0.0286(8) 0.0311(9) 0.0262(8) -0.0054(6) 0.0063(6) -0.0097(6)
O2 0.0261(9) 0.0503(11) 0.0313(9) -0.0049(7) 0.0023(7) 0.0147(7)
N1 0.0260(10) 0.0297(11) 0.0271(9) -0.0025(8) 0.0004(8) 0.0032(8)
C4 0.0210(10) 0.0199(11) 0.0212(10) 0.0026(8) 0.0068(8) -0.0005(8)
O3 0.0360(10) 0.0354(10) 0.0480(10) 0.0125(8) 0.0051(8) 0.0015(7)
C2 0.0209(10) 0.0191(11) 0.0228(10) 0.0008(8) 0.0065(8) -0.0004(8)
C19 0.0231(11) 0.0244(11) 0.0199(10) 0.0014(8) 0.0073(8) 0.0030(8)
C24 0.0197(10) 0.0217(11) 0.0203(10) 0.0018(8) 0.0029(8) 0.0016(8)
C12 0.0176(10) 0.0238(11) 0.0195(10) -0.0041(8) 0.0051(8) -0.0003(8)
C1 0.0215(11) 0.0219(11) 0.0248(10) 0.0034(8) 0.0051(8) -0.0019(8)
C16 0.0227(11) 0.0234(11) 0.0200(10) -0.0045(8) 0.0011(8) 0.0037(8)
C17 0.0220(11) 0.0252(12) 0.0224(10) -0.0027(8) 0.0046(8) -0.0011(8)
C3 0.0231(11) 0.0166(10) 0.0214(10) 0.0039(7) 0.0060(8) 0.0009(8)
C18 0.0184(10) 0.0198(11) 0.0213(10) 0.0000(8) 0.0057(8) 0.0032(8)
C20 0.0185(10) 0.0222(11) 0.0263(11) 0.0008(8) 0.0056(8) 0.0006(8)
C23 0.0215(11) 0.0245(11) 0.0258(11) 0.0028(8) 0.0068(8) -0.0020(8)
C13 0.0237(11) 0.0260(12) 0.0239(10) 0.0010(8) 0.0068(8) 0.0008(8)
C14 0.0258(12) 0.0314(13) 0.0280(11) -0.0018(9) 0.0099(9) -0.0049(9)
C6 0.0226(11) 0.0175(11) 0.0235(10) 0.0009(8) 0.0072(8) -0.0049(8)
C21 0.0210(10) 0.0216(11) 0.0234(10) -0.0029(8) 0.0036(8) 0.0022(8)
C27 0.0316(12) 0.0322(13) 0.0304(12) 0.0022(9) 0.0155(10) 0.0067(9)
C11 0.0241(11) 0.0250(12) 0.0233(10) 0.0015(8) 0.0065(8) -0.0031(8)
C29 0.0241(11) 0.0266(12) 0.0306(12) -0.0016(9) 0.0083(9) -0.0028(8)
C8 0.0279(12) 0.0334(13) 0.0259(11) 0.0002(9) 0.0000(9) -0.0051(9)
C7 0.0227(11) 0.0248(12) 0.0278(11) 0.0007(8) 0.0048(9) -0.0019(8)
C5 0.0207(10) 0.0189(11) 0.0237(10) 0.0020(8) 0.0063(8) 0.0019(8)
C26 0.0286(12) 0.0233(12) 0.0258(11) -0.0009(8) 0.0087(9) 0.0020(9)
C25 0.0208(10) 0.0231(11) 0.0267(10) 0.0021(8) 0.0052(8) 0.0014(8)
C15 0.0170(10) 0.0354(13) 0.0266(11) -0.0079(9) 0.0059(8) -0.0014(9)
C10 0.0330(12) 0.0207(11) 0.0302(11) -0.0012(9) 0.0122(9) -0.0025(9)
C22 0.0253(11) 0.0313(13) 0.0209(10) 0.0009(8) 0.0073(8) 0.0002(9)
C28 0.0242(12) 0.0363(14) 0.0379(12) 0.0013(10) 0.0162(9) 0.0029(9)
C9 0.0343(13) 0.0286(13) 0.0233(11) -0.0049(9) 0.0076(9) -0.0073(9)
C30 0.0321(13) 0.0385(14) 0.0308(12) -0.0049(10) 0.0069(10) -0.0154(10)
 
_geom_special_details
;
 All esds (except the esd in the dihedral angle between two l.s. planes)
 are estimated using the full covariance matrix.  The cell esds are taken
 into account individually in the estimation of esds in distances, angles
 and torsion angles; correlations between esds in cell parameters are only
 used when they are defined by crystal symmetry.  An approximate (isotropic)
 treatment of cell esds is used for estimating esds involving l.s. planes.
;
 
loop_
 _geom_bond_atom_site_label_1
 _geom_bond_atom_site_label_2
 _geom_bond_distance
 _geom_bond_site_symmetry_2
 _geom_bond_publ_flag
O1 C1 1.223(2) . ?
O4 C21 1.371(2) . ?
O4 C30 1.432(2) . ?
O2 N1 1.228(2) . ?
N1 O3 1.230(2) . ?
N1 C16 1.477(3) . ?
C4 C5 1.359(3) . ?
C4 C12 1.487(3) . ?
C4 C3 1.512(3) . ?
C2 C3 1.353(3) . ?
C2 C24 1.477(3) . ?
C2 C1 1.501(3) . ?
C19 C18 1.388(3) . ?
C19 C20 1.396(3) . ?
C19 H19 0.9300 . ?
C24 C25 1.396(3) . ?
C24 C29 1.397(3) . ?
C12 C17 1.392(3) . ?
C12 C13 1.400(3) . ?
C1 C5 1.519(3) . ?
C16 C15 1.381(3) . ?
C16 C17 1.386(3) . ?
C17 H17 0.9300 . ?
C3 C18 1.480(3) . ?
C18 C23 1.407(3) . ?
C20 C21 1.390(3) . ?
C20 H20 0.9300 . ?
C23 C22 1.375(3) . ?
C23 H23 0.9300 . ?
C13 C14 1.388(3) . ?
C13 H13 0.9300 . ?
C14 C15 1.377(3) . ?
C14 H14 0.9300 . ?
C6 C11 1.400(3) . ?
C6 C7 1.409(3) . ?
C6 C5 1.466(3) . ?
C21 C22 1.396(3) . ?
C27 C28 1.382(3) . ?
C27 C26 1.390(3) . ?
C27 H27 0.9300 . ?
C11 C10 1.384(3) . ?
C11 H11 0.9300 . ?
C29 C28 1.383(3) . ?
C29 H29 0.9300 . ?
C8 C9 1.380(3) . ?
C8 C7 1.386(3) . ?
C8 H8 0.9300 . ?
C7 H7 0.9300 . ?
C26 C25 1.389(3) . ?
C26 H26 0.9300 . ?
C25 H25 0.9300 . ?
C15 H15 0.9300 . ?
C10 C9 1.385(3) . ?
C10 H10 0.9300 . ?
C22 H22 0.9300 . ?
C28 H28 0.9300 . ?
C9 H9 0.9300 . ?
C30 H30A 0.9600 . ?
C30 H30B 0.9600 . ?
C30 H30C 0.9600 . ?
 
loop_
 _geom_angle_atom_site_label_1
 _geom_angle_atom_site_label_2
 _geom_angle_atom_site_label_3
 _geom_angle
 _geom_angle_site_symmetry_1
 _geom_angle_site_symmetry_3
 _geom_angle_publ_flag
C21 O4 C30 117.40(16) . . ?
O2 N1 O3 123.83(19) . . ?
O2 N1 C16 118.12(18) . . ?
O3 N1 C16 118.04(18) . . ?
C5 C4 C12 128.62(18) . . ?
C5 C4 C3 110.17(17) . . ?
C12 C4 C3 121.18(16) . . ?
C3 C2 C24 129.85(18) . . ?
C3 C2 C1 106.32(17) . . ?
C24 C2 C1 123.41(17) . . ?
C18 C19 C20 121.83(18) . . ?
C18 C19 H19 119.1 . . ?
C20 C19 H19 119.1 . . ?
C25 C24 C29 118.09(19) . . ?
C25 C24 C2 120.01(18) . . ?
C29 C24 C2 121.81(18) . . ?
C17 C12 C13 118.78(19) . . ?
C17 C12 C4 119.79(18) . . ?
C13 C12 C4 121.41(18) . . ?
O1 C1 C2 125.44(19) . . ?
O1 C1 C5 126.56(19) . . ?
C2 C1 C5 108.00(16) . . ?
C15 C16 C17 122.93(19) . . ?
C15 C16 N1 118.31(18) . . ?
C17 C16 N1 118.75(18) . . ?
C16 C17 C12 118.73(19) . . ?
C16 C17 H17 120.6 . . ?
C12 C17 H17 120.6 . . ?
C2 C3 C18 125.57(17) . . ?
C2 C3 C4 110.02(16) . . ?
C18 C3 C4 124.41(17) . . ?
C19 C18 C23 117.78(17) . . ?
C19 C18 C3 122.36(17) . . ?
C23 C18 C3 119.46(17) . . ?
C21 C20 C19 119.07(19) . . ?
C21 C20 H20 120.5 . . ?
C19 C20 H20 120.5 . . ?
C22 C23 C18 121.12(19) . . ?
C22 C23 H23 119.4 . . ?
C18 C23 H23 119.4 . . ?
C14 C13 C12 120.93(19) . . ?
C14 C13 H13 119.5 . . ?
C12 C13 H13 119.5 . . ?
C15 C14 C13 120.5(2) . . ?
C15 C14 H14 119.8 . . ?
C13 C14 H14 119.8 . . ?
C11 C6 C7 117.38(18) . . ?
C11 C6 C5 122.47(18) . . ?
C7 C6 C5 120.11(18) . . ?
O4 C21 C20 124.60(18) . . ?
O4 C21 C22 115.45(17) . . ?
C20 C21 C22 119.95(18) . . ?
C28 C27 C26 119.6(2) . . ?
C28 C27 H27 120.2 . . ?
C26 C27 H27 120.2 . . ?
C10 C11 C6 121.21(19) . . ?
C10 C11 H11 119.4 . . ?
C6 C11 H11 119.4 . . ?
C28 C29 C24 120.8(2) . . ?
C28 C29 H29 119.6 . . ?
C24 C29 H29 119.6 . . ?
C9 C8 C7 120.8(2) . . ?
C9 C8 H8 119.6 . . ?
C7 C8 H8 119.6 . . ?
C8 C7 C6 120.8(2) . . ?
C8 C7 H7 119.6 . . ?
C6 C7 H7 119.6 . . ?
C4 C5 C6 130.79(18) . . ?
C4 C5 C1 105.49(17) . . ?
C6 C5 C1 123.69(17) . . ?
C25 C26 C27 119.8(2) . . ?
C25 C26 H26 120.1 . . ?
C27 C26 H26 120.1 . . ?
C26 C25 C24 121.10(19) . . ?
C26 C25 H25 119.4 . . ?
C24 C25 H25 119.4 . . ?
C14 C15 C16 118.14(19) . . ?
C14 C15 H15 120.9 . . ?
C16 C15 H15 120.9 . . ?
C11 C10 C9 120.6(2) . . ?
C11 C10 H10 119.7 . . ?
C9 C10 H10 119.7 . . ?
C23 C22 C21 120.17(18) . . ?
C23 C22 H22 119.9 . . ?
C21 C22 H22 119.9 . . ?
C27 C28 C29 120.5(2) . . ?
C27 C28 H28 119.7 . . ?
C29 C28 H28 119.7 . . ?
C8 C9 C10 119.2(2) . . ?
C8 C9 H9 120.4 . . ?
C10 C9 H9 120.4 . . ?
O4 C30 H30A 109.5 . . ?
O4 C30 H30B 109.5 . . ?
H30A C30 H30B 109.5 . . ?
O4 C30 H30C 109.5 . . ?
H30A C30 H30C 109.5 . . ?
H30B C30 H30C 109.5 . . ?
 
loop_
 _geom_torsion_atom_site_label_1
 _geom_torsion_atom_site_label_2
 _geom_torsion_atom_site_label_3
 _geom_torsion_atom_site_label_4
 _geom_torsion
 _geom_torsion_site_symmetry_1
 _geom_torsion_site_symmetry_2
 _geom_torsion_site_symmetry_3
 _geom_torsion_site_symmetry_4
 _geom_torsion_publ_flag
C3 C2 C24 C25 35.5(3) . . . . ?
C1 C2 C24 C25 -136.0(2) . . . . ?
C3 C2 C24 C29 -148.0(2) . . . . ?
C1 C2 C24 C29 40.5(3) . . . . ?
C5 C4 C12 C17 -91.9(3) . . . . ?
C3 C4 C12 C17 85.7(2) . . . . ?
C5 C4 C12 C13 89.9(3) . . . . ?
C3 C4 C12 C13 -92.5(2) . . . . ?
C3 C2 C1 O1 179.67(19) . . . . ?
C24 C2 C1 O1 -7.2(3) . . . . ?
C3 C2 C1 C5 0.1(2) . . . . ?
C24 C2 C1 C5 173.25(17) . . . . ?
O2 N1 C16 C15 2.0(3) . . . . ?
O3 N1 C16 C15 -177.09(18) . . . . ?
O2 N1 C16 C17 -179.37(17) . . . . ?
O3 N1 C16 C17 1.5(3) . . . . ?
C15 C16 C17 C12 0.7(3) . . . . ?
N1 C16 C17 C12 -177.83(17) . . . . ?
C13 C12 C17 C16 -0.9(3) . . . . ?
C4 C12 C17 C16 -179.24(17) . . . . ?
C24 C2 C3 C18 7.3(3) . . . . ?
C1 C2 C3 C18 179.82(18) . . . . ?
C24 C2 C3 C4 -172.65(19) . . . . ?
C1 C2 C3 C4 -0.1(2) . . . . ?
C5 C4 C3 C2 0.1(2) . . . . ?
C12 C4 C3 C2 -177.98(17) . . . . ?
C5 C4 C3 C18 -179.86(18) . . . . ?
C12 C4 C3 C18 2.1(3) . . . . ?
C20 C19 C18 C23 -2.6(3) . . . . ?
C20 C19 C18 C3 170.19(18) . . . . ?
C2 C3 C18 C19 -123.0(2) . . . . ?
C4 C3 C18 C19 56.9(3) . . . . ?
C2 C3 C18 C23 49.6(3) . . . . ?
C4 C3 C18 C23 -130.5(2) . . . . ?
C18 C19 C20 C21 0.8(3) . . . . ?
C19 C18 C23 C22 1.8(3) . . . . ?
C3 C18 C23 C22 -171.22(18) . . . . ?
C17 C12 C13 C14 0.3(3) . . . . ?
C4 C12 C13 C14 178.59(18) . . . . ?
C12 C13 C14 C15 0.6(3) . . . . ?
C30 O4 C21 C20 -5.7(3) . . . . ?
C30 O4 C21 C22 175.21(18) . . . . ?
C19 C20 C21 O4 -177.10(18) . . . . ?
C19 C20 C21 C22 1.9(3) . . . . ?
C7 C6 C11 C10 1.1(3) . . . . ?
C5 C6 C11 C10 -176.35(19) . . . . ?
C25 C24 C29 C28 1.7(3) . . . . ?
C2 C24 C29 C28 -174.84(19) . . . . ?
C9 C8 C7 C6 0.6(3) . . . . ?
C11 C6 C7 C8 -1.7(3) . . . . ?
C5 C6 C7 C8 175.83(19) . . . . ?
C12 C4 C5 C6 -3.9(4) . . . . ?
C3 C4 C5 C6 178.2(2) . . . . ?
C12 C4 C5 C1 177.86(18) . . . . ?
C3 C4 C5 C1 0.0(2) . . . . ?
C11 C6 C5 C4 27.1(3) . . . . ?
C7 C6 C5 C4 -150.3(2) . . . . ?
C11 C6 C5 C1 -154.98(19) . . . . ?
C7 C6 C5 C1 27.7(3) . . . . ?
O1 C1 C5 C4 -179.6(2) . . . . ?
C2 C1 C5 C4 -0.1(2) . . . . ?
O1 C1 C5 C6 2.0(3) . . . . ?
C2 C1 C5 C6 -178.45(18) . . . . ?
C28 C27 C26 C25 1.2(3) . . . . ?
C27 C26 C25 C24 0.5(3) . . . . ?
C29 C24 C25 C26 -1.9(3) . . . . ?
C2 C24 C25 C26 174.69(17) . . . . ?
C13 C14 C15 C16 -0.8(3) . . . . ?
C17 C16 C15 C14 0.2(3) . . . . ?
N1 C16 C15 C14 178.71(17) . . . . ?
C6 C11 C10 C9 0.6(3) . . . . ?
C18 C23 C22 C21 0.8(3) . . . . ?
O4 C21 C22 C23 176.39(17) . . . . ?
C20 C21 C22 C23 -2.7(3) . . . . ?
C26 C27 C28 C29 -1.4(3) . . . . ?
C24 C29 C28 C27 -0.1(3) . . . . ?
C7 C8 C9 C10 1.2(3) . . . . ?
C11 C10 C9 C8 -1.8(3) . . . . ?
 
 
#===END
